# Supplementary material for: Beneficial effects of colchicine for moderate to severe COVID-19: a randomised, double-blinded, placebo-controlled clinical trial
Source: HighWire-hosted journal article supplement (doi:10.1136/rmdopen-2020-001455), 2021-02-01
Supplement: rmdopen-2020-001455supp002_data_supplement.pdf [file rmdopen-2020-001455supp002_data_supplement.pdf]

## Relation neutrophil to lymphocyte

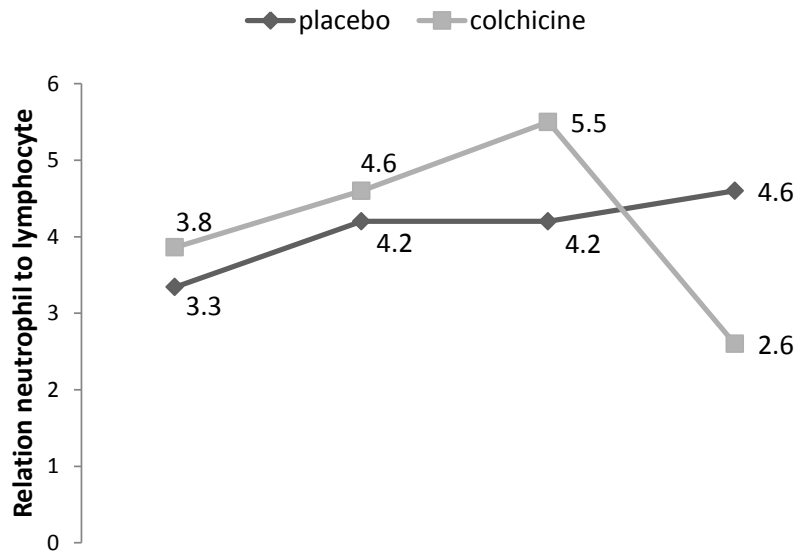

|                                          | Group      | Day zero      | Day 2         | Day 4         | Day 7         | p-value |
|------------------------------------------|------------|---------------|---------------|---------------|---------------|---------|
| Neutrophil to lymphocyte [median; (IQR)] | Placebo    | 3.4 (2.2-6.2) | 4.1 (2.8-7.6) | 4.0 (2.6-8.1) | 3.5 (1.6-8.2) | 0.55    |
|                                          | Colchicine | 2.8 (2.4-4.4) | 3.7 (2.1-6.7) | 3.0 (2.0-7.7) | 1.5 (1.3-5.6) |         |

IQR – Interquartile range

**Supplemental Figure 2.** Temporal variation blood relation neutrophil to lymphocyte from D zero to D7 for both groups
